# Supplementary material for: Elucidating the charge carrier transport and extraction in planar heterojunction perovskite solar cells by Kelvin probe force microscopy
Source: Royal Society of Chemistry journal article supplement (doi:10.1039/c6ta05350e), 2016-01-01
Supplement: c6ta05350e1.pdf [file c6ta05350e1.pdf]

## Supporting information for

# Elucidating the Charge Carrier Transport and Extraction in Planar Heterojunction Perovskite Solar Cells by Kelvin Probe Force Microscopy

*Jingjing Chang,<sup>a,b†\*</sup> Juanxiu Xiao,<sup>c†</sup> Zhenhua Lin,<sup>b</sup> Hai Zhu,<sup>d</sup> Qing-Hua Xu,<sup>d,\*</sup> Kaiyang  
Zeng,<sup>c</sup> Yue Hao,<sup>b</sup> Jianyong Ouyang<sup>a,\*</sup>*

<sup>a</sup>Department of Materials Science and Engineering, National University of Singapore.

<sup>b</sup>State Key Laboratory of Wide Band Gap Semiconductor Technology, School of Microelectronics, Xidian University, 2 South Taibai Road, Xi'an, China 710071.

<sup>c</sup>Department of Mechanical Engineering, National University of Singapore, 9 Engineering Drive 1, Singapore 117576.

<sup>d</sup>Department of Chemistry, National University of Singapore, 3 Science Drive 3, Singapore 117543.

AUTHOR INFORMATION

**Corresponding Author**

**E-mail: mseoj@nus.edu.sg, jjingchang@xidian.edu.cn**

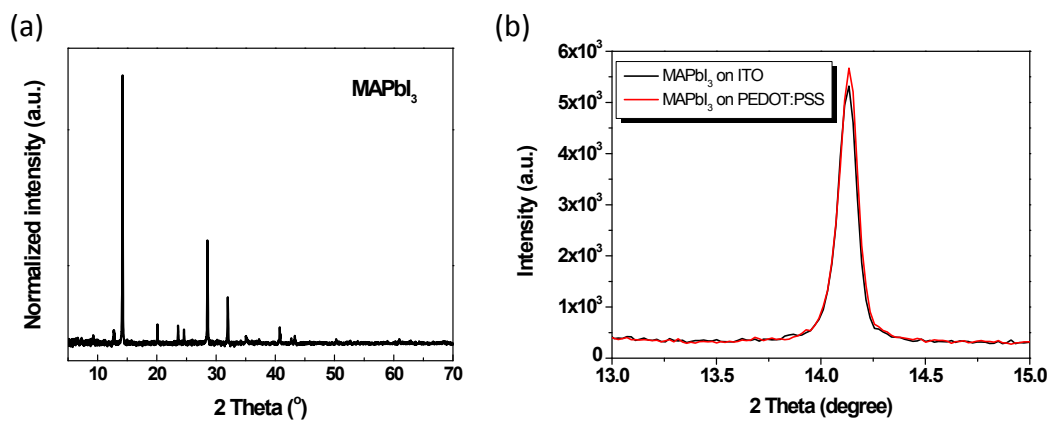

**Figure S1.** (a) XRD pattern of MAPbI<sub>3</sub> thin film with or without PEDOT:PSS interlayer. (b) (110) diffraction peak of MAPbI<sub>3</sub> thin film with or without PEDOT:PSS interlayer.

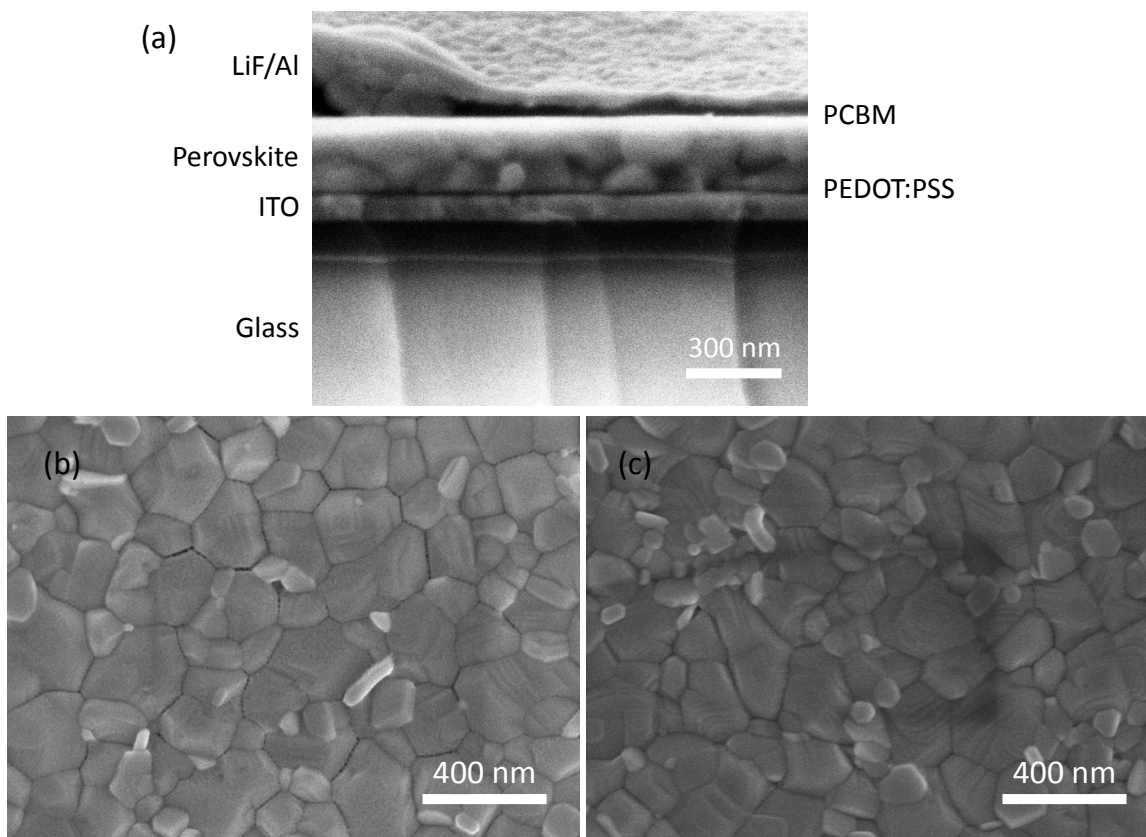

**Figure S2.** (a) Cross sectional image of perovskite thin films. (b-c) The SEM images of perovskite films deposited on ITO (b) and PEDOT:PSS (c).

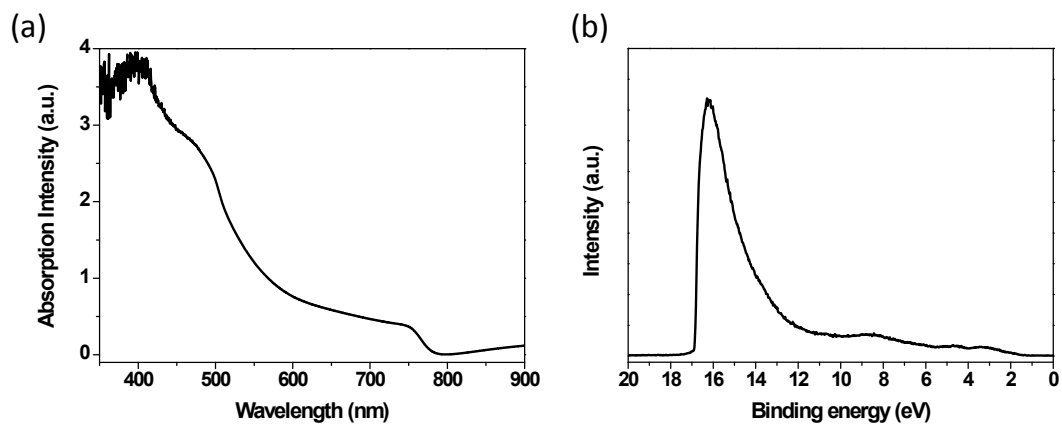

**Figure S3.** (a) UV-Vis absorption spectrum and (b) UPS spectrum of a MAPbI<sub>3</sub> thin film.

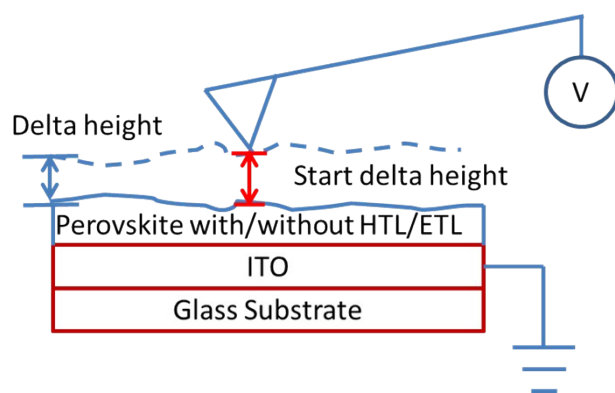

**Figure S4.** Experimental set-up for the KPFM measurement.

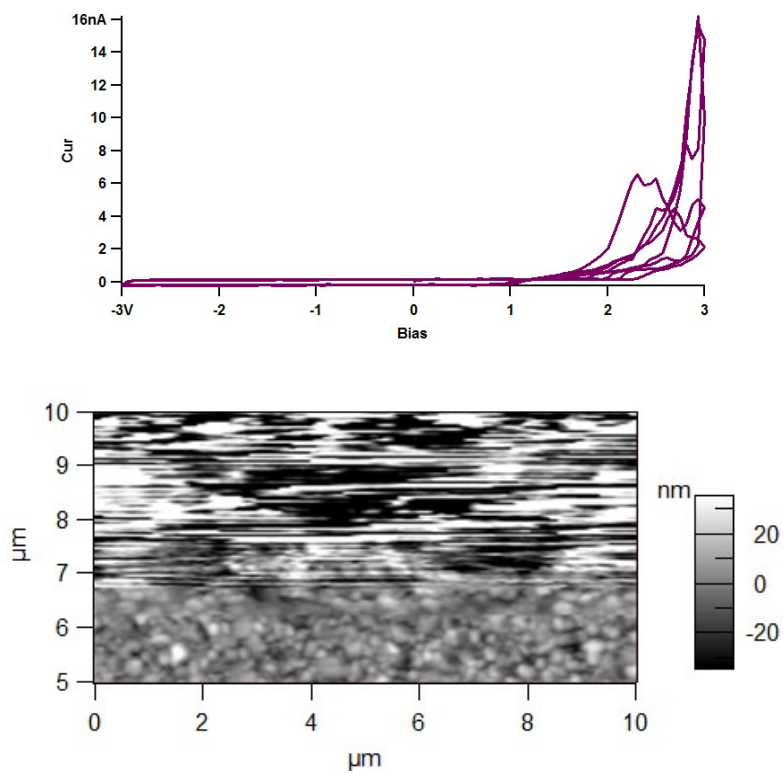

**Figure S5.** I-V curves and current image measured by C-AFM. The voltage is applied to the ITO. Hence, the applied positive sample bias is corresponded to the negative bias in PFM or KPFM mode.

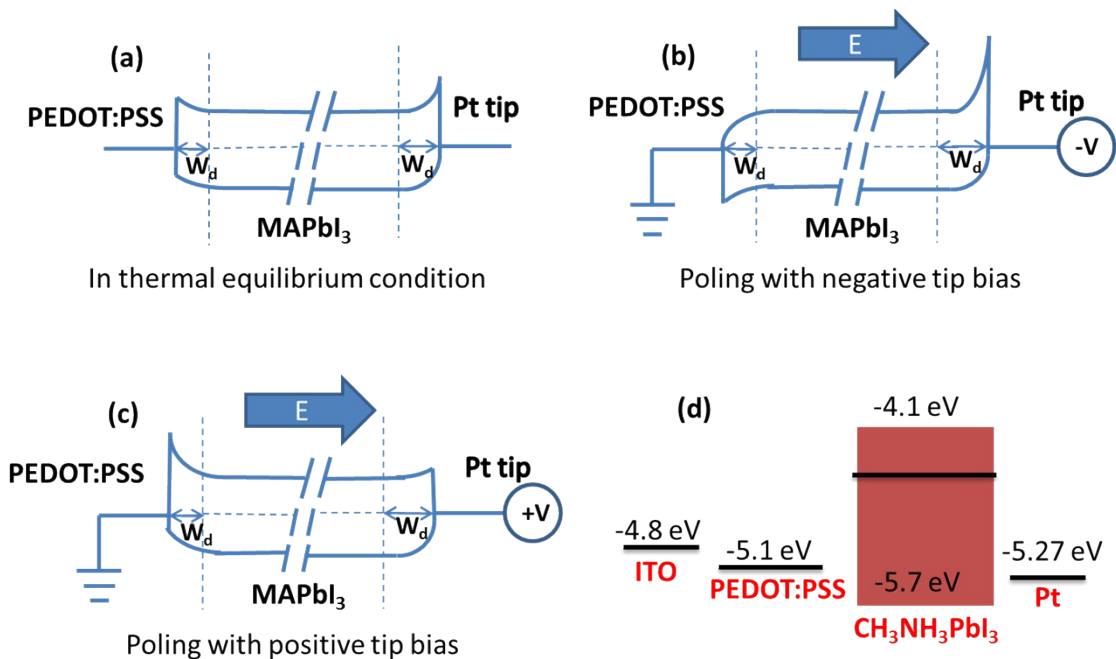

**Figure S6.** Schematic energy band diagrams and the Schottky barriers for PEDOT:PSS/MAPbI<sub>3</sub>/Pt system: (a) in an ideal thermal equilibrium condition without external field; (b) when a negative bias is applied to the tip; and (c) when a positive bias is applied to the tip. In all of the figures,  $w_d$  indicates the width of the depletion region. (d) Energy band diagram of the measured structure.

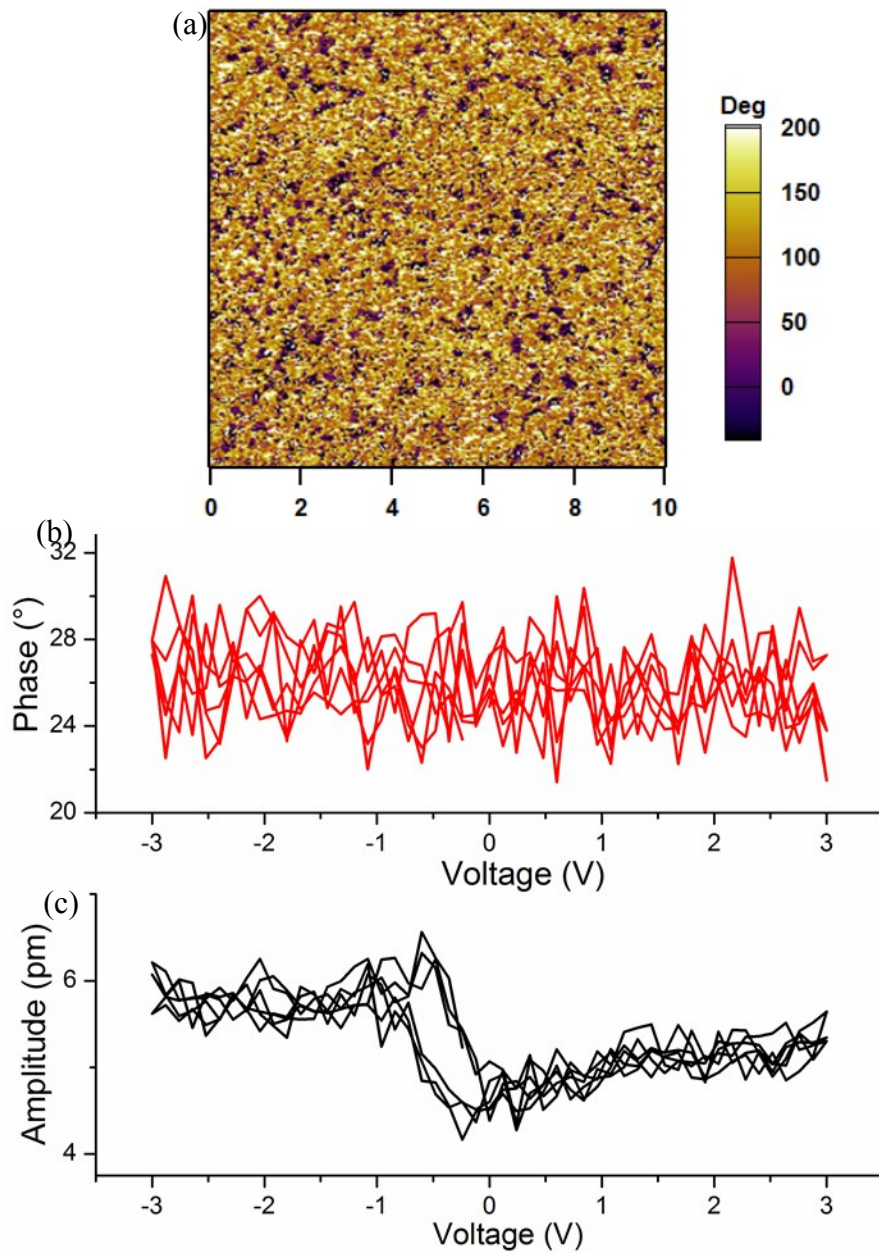

**Figure S7.** (a) PFM phase images of perovskite thin film under  $250 \text{ W/m}^2$  illumination (light on) after the same DC poling process on the structure with both interlayer; (b) phase loops; and (c) amplitude loops.

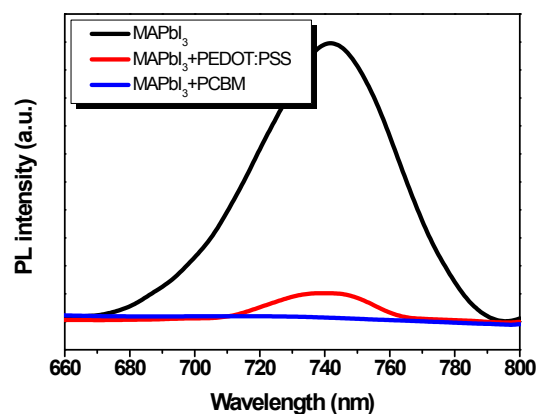

**Figure S8.** Steady-state PL spectra of MAPbI<sub>3</sub> without and with hole/electron transport interlayers.

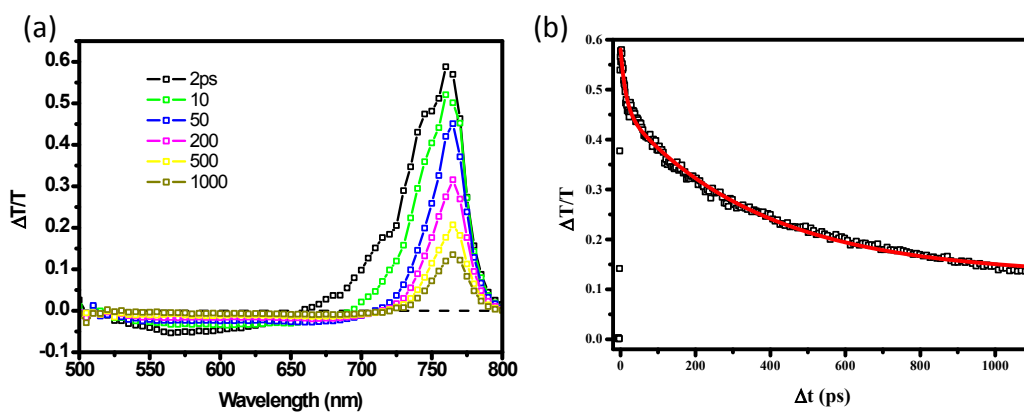

**Figure S9.** (a) Transient absorption spectrum. (b) Bleaching dynamics probed at 760nm on MAPbI<sub>3</sub> thin films.

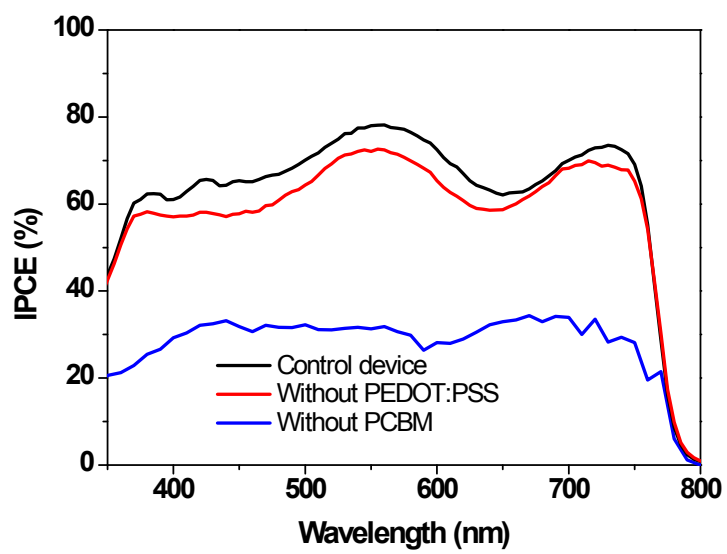

**Figure S10.** IPCE spectra of the solar cell devices processed with different conditions.
